# Supplementary material
Source: HighWire-hosted journal article supplement (https://erj.ersjournals.com/content/54/5/1900476)

**Figure E1: Adjusted hazard ratios of AIDs in combinations of ADs. Forest plot summarising adjusted hazard ratios (aHR) of AIDs in combinations of 1, 2 or 3 ADs. The figure illustrates an overall trend towards higher aHRs for respective AIDs in the presence of  $\geq 2$  ADs. aHRs calculated using Cox proportional hazards**

## Risk of AutoImmune Disorders

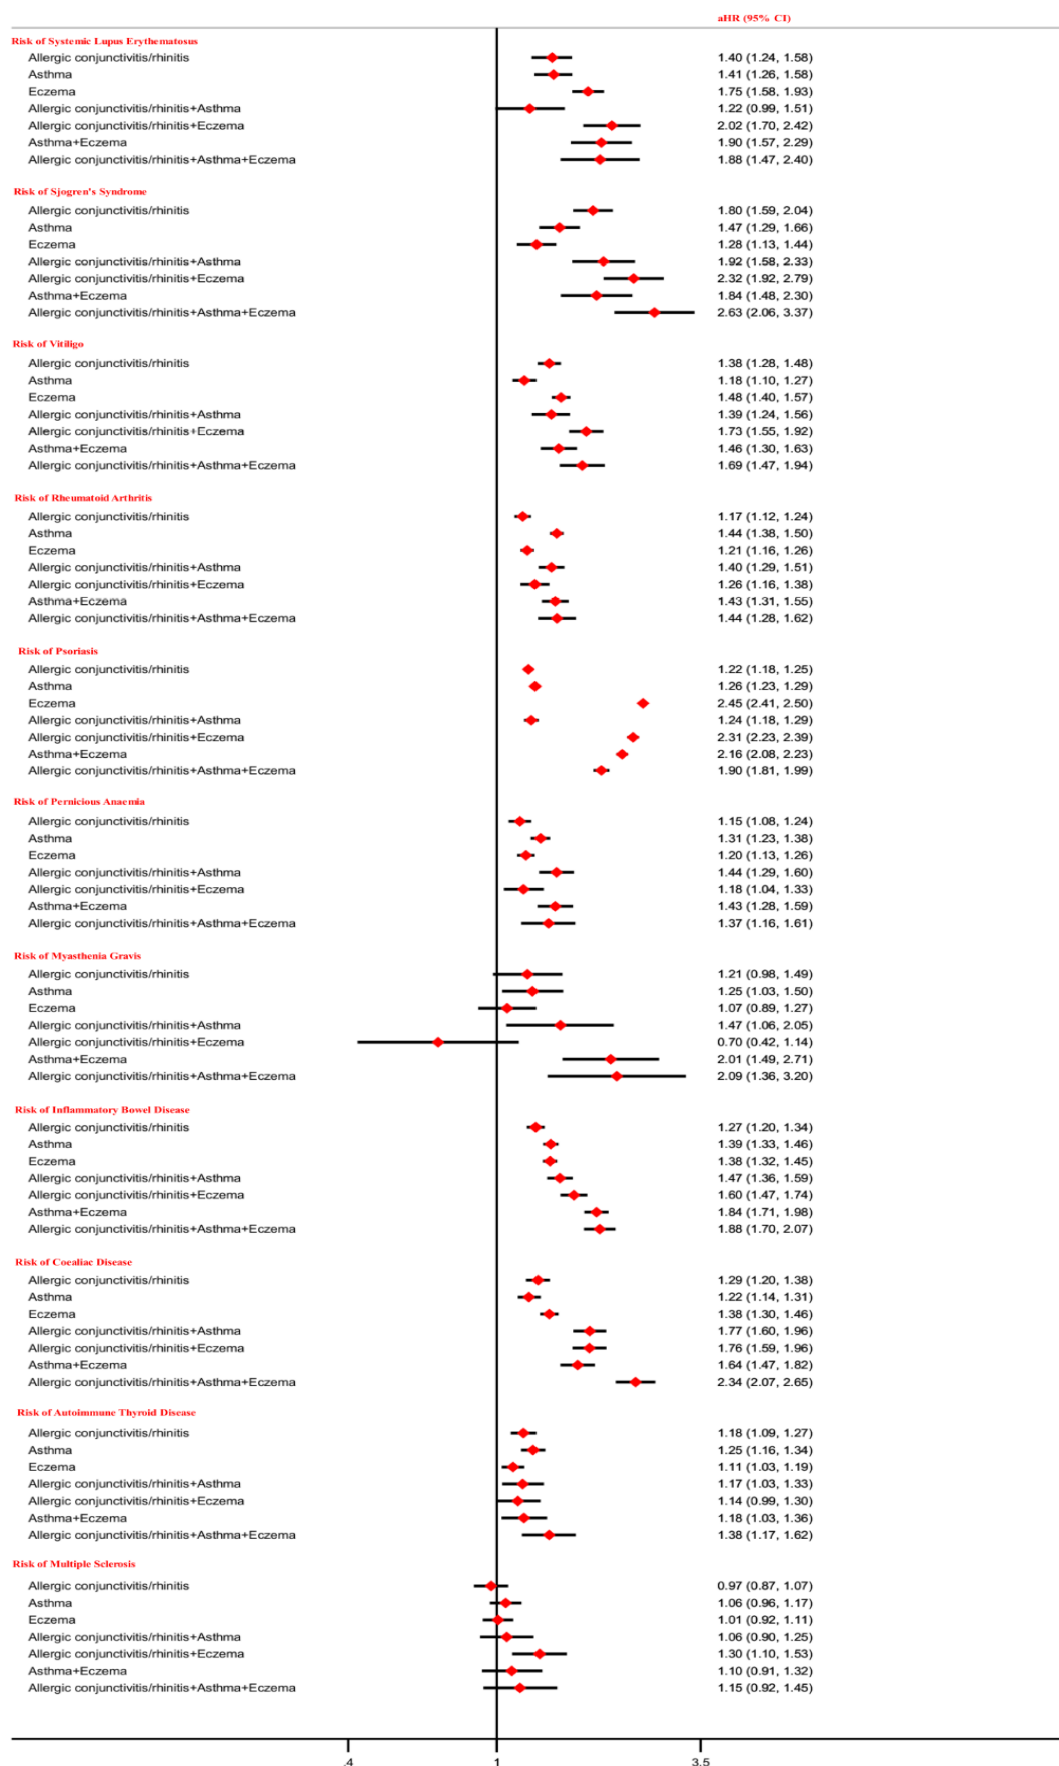

Supplement: inline-supplementary-material-2 [file inline-supplementary-material-2.pdf]
