# Supplementary material
Source: HighWire-hosted journal article supplement (https://erj.ersjournals.com/content/54/5/1900476)
Supplement: inline-supplementary-material-3 [file inline-supplementary-material-3.pdf]

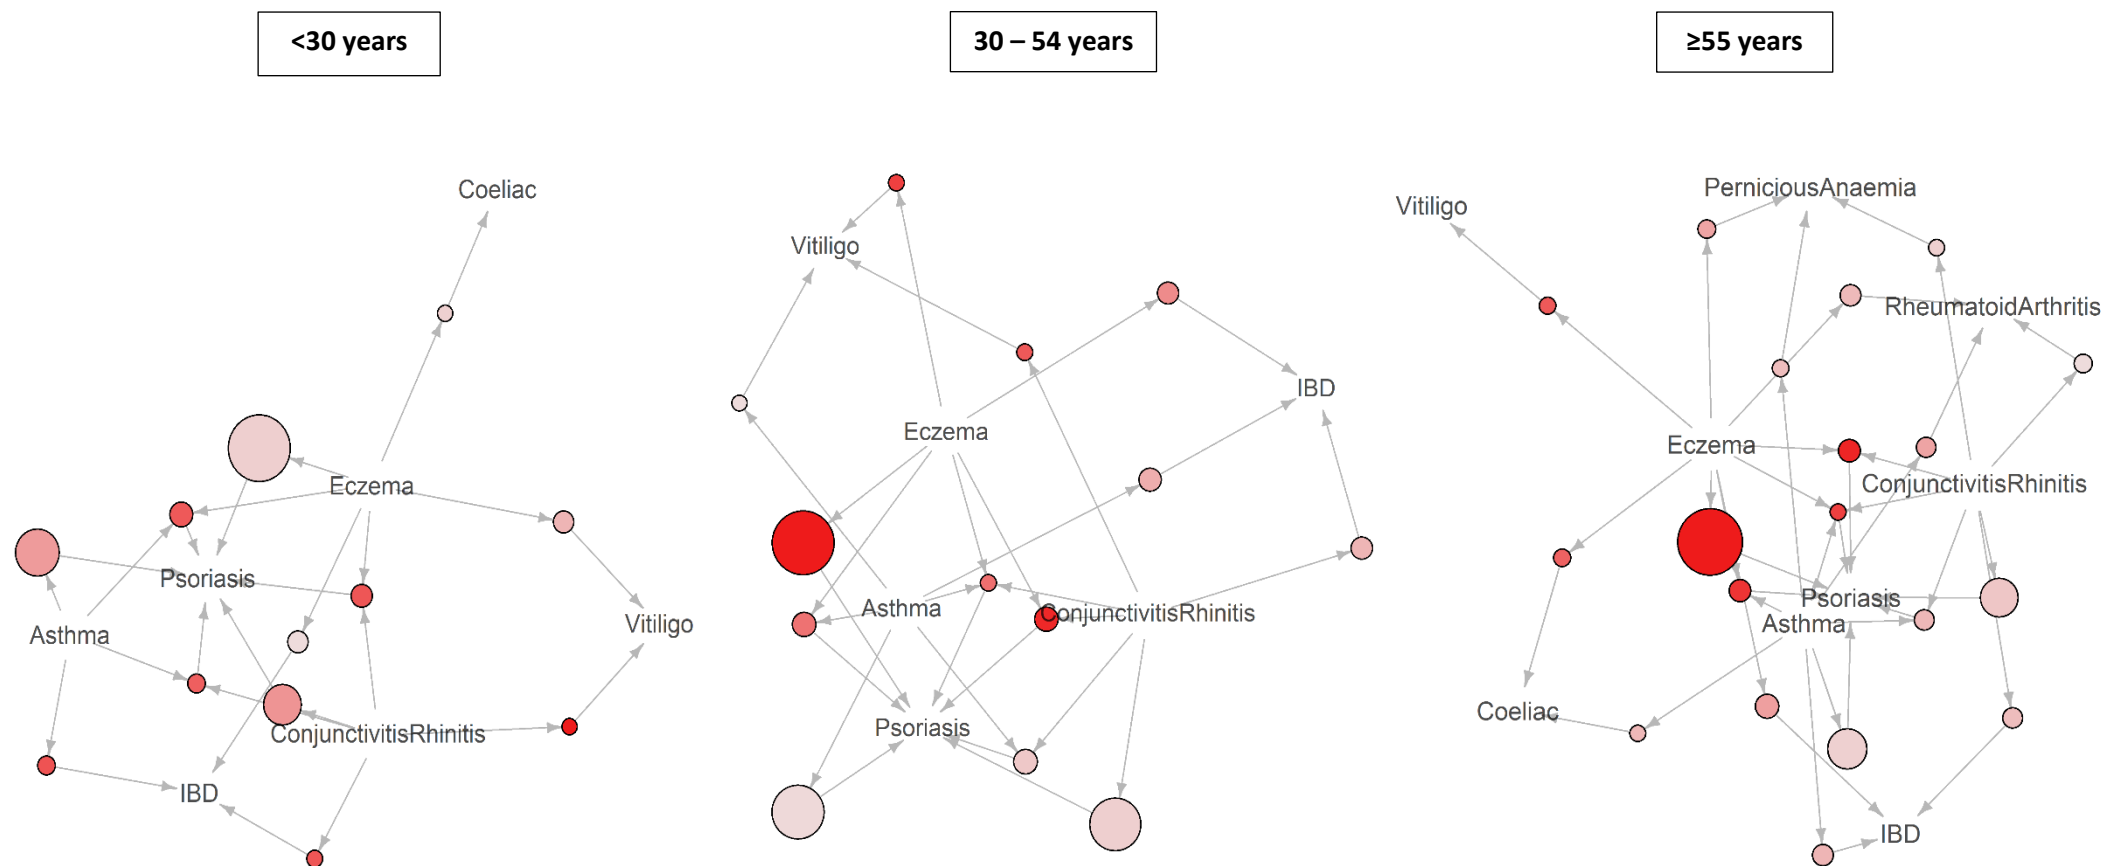

**Figure E2:** Sub-group ARM analysis by age in males. To be reviewed in conjunction with tables E3–E5. Each arrow connects an AD (antecedent) with an AID (consequent) via circles (or nodes). The size and the intensity of colour within each circle represent the level of 'support' and level of 'lift' respectively, *i.e.*, larger the circle and darker the colour, greater is the 'support' and 'lift' respectively.
