# Supplementary material
Source: HighWire-hosted journal article supplement (https://erj.ersjournals.com/content/54/5/1900476)
Supplement: inline-supplementary-material-4 [file inline-supplementary-material-4.pdf]

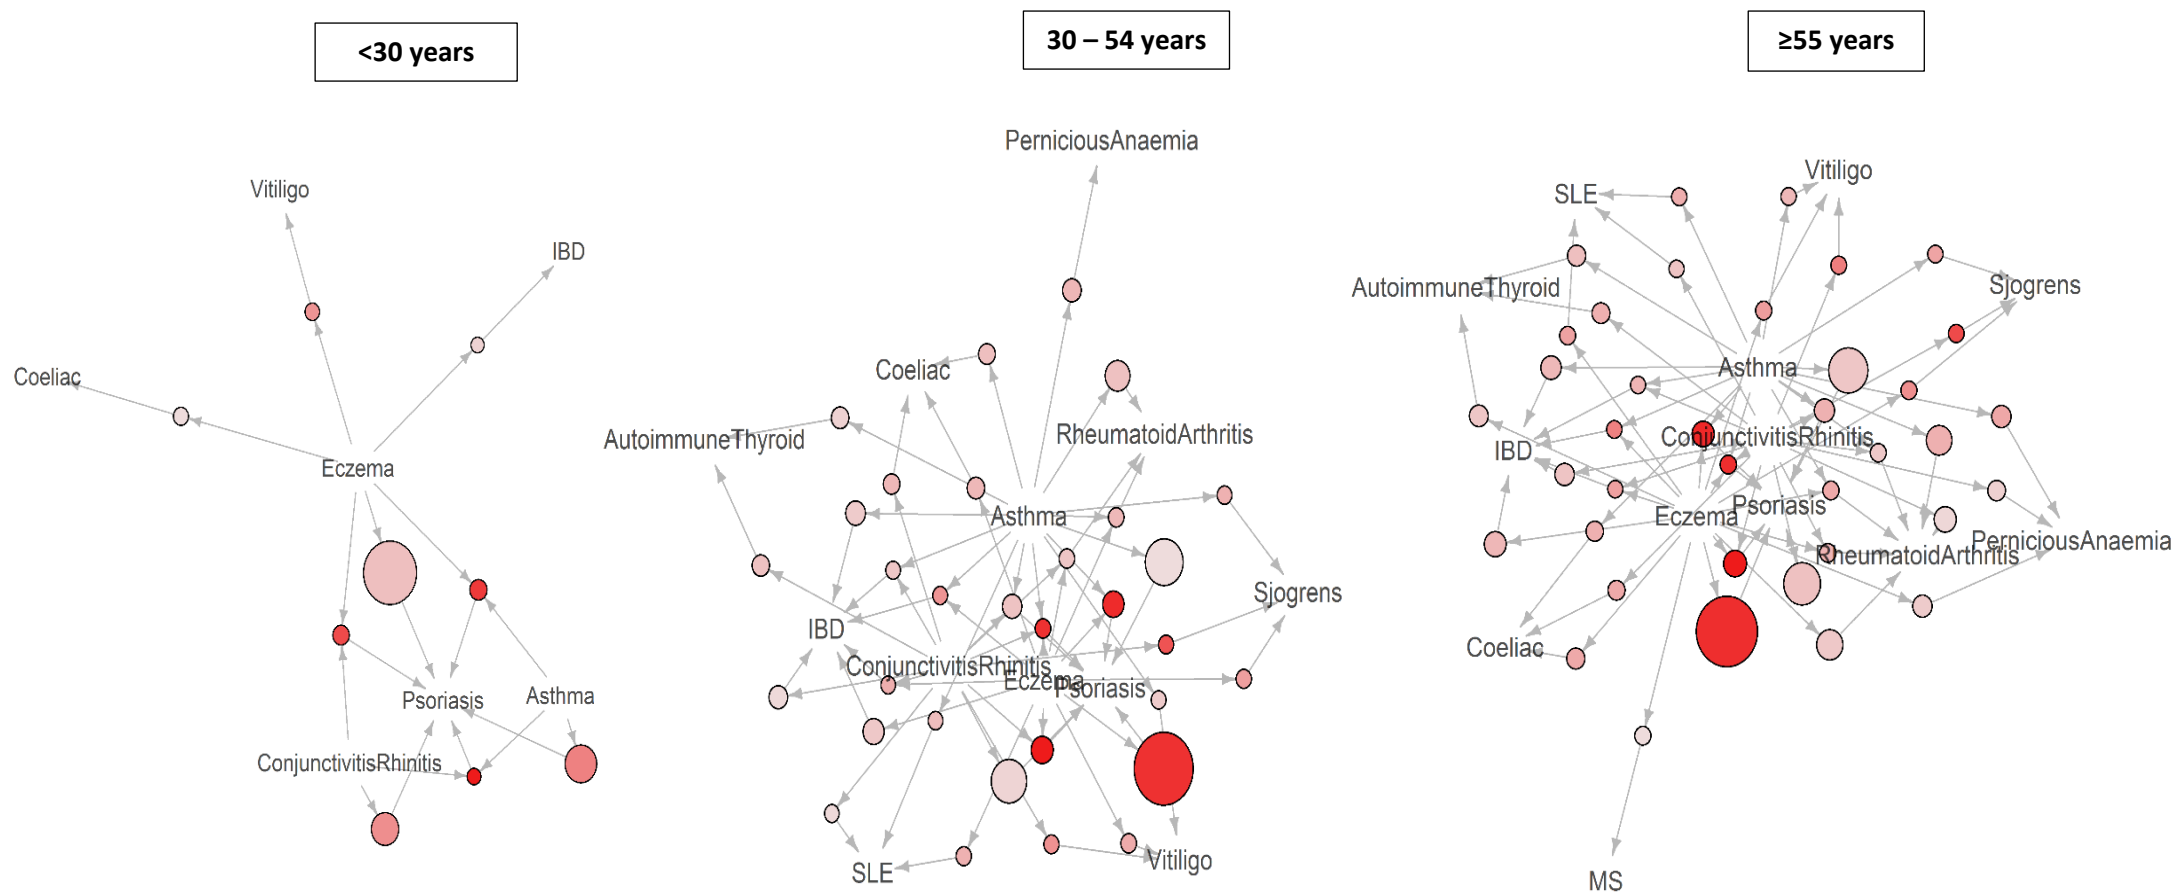

**Figure E3:** Sub-group ARM analysis by age in females. To be reviewed in conjunction with tables E6–E8. Each arrow connects an AD (antecedent) with an AID (consequent) *via* circles (or nodes). The size and the intensity of colour within each circle represent the level of 'support' and level of 'lift' respectively, *i.e.*, larger the circle and darker the colour, greater is the 'support' and 'lift' respectively.
